# Ecto-Nucleotidase Activities of Promastigotes from *Leishmania (Viannia) braziliensis* Relates to Parasite Infectivity and Disease Clinical Outcome

Pauline M. Leite<sup>1</sup>, Rodrigo S. Gomes<sup>1</sup>, Amanda B. Figueiredo<sup>1</sup>, Tiago D. Serafim<sup>1</sup>, Wagner L. Tafuri<sup>2</sup>, Carolina C. de Souza<sup>2</sup>, Sandra A. L. Moura<sup>1</sup>, Juliana L. R. Fietto<sup>3</sup>, Maria N. Melo<sup>4</sup>, Fátima Ribeiro-Dias<sup>5</sup>, Milton A. P. Oliveira<sup>5</sup>, Ana Rabello<sup>6</sup>, Luís C. C. Afonso<sup>1\*</sup>

**1** Laboratório de Imunoparasitologia, DECBI/NUPEB, Universidade Federal de Ouro Preto, Minas Gerais, Brazil, **2** Departamento de Patologia Geral, ICB, UFMG, Belo Horizonte, Minas Gerais, Brazil, **3** Departamento de Bioquímica e Biologia Molecular, Universidade Federal de Viçosa, Minas Gerais, Brazil, **4** Universidade Federal de Minas Gerais, Belo Horizonte, Brazil, **5** Instituto de Patologia Tropical e Saúde Pública, Universidade Federal de Goiás, Goiânia, Goiás, Brazil, **6** Centro de Pesquisas René Rachou-FIOCRUZ, Belo Horizonte, Minas Gerais, Brazil

## Abstract

**Background:** *Leishmania (Viannia) braziliensis* has been associated with a broad range of clinical manifestations ranging from a simple cutaneous ulcer to destructive mucosal lesions. Factors leading to this diversity of clinical presentations are not clear, but parasite factors have lately been recognized as important in determining disease progression. Given the fact that the activity of ecto-nucleotidases correlates with parasitism and the development of infection, we evaluated the activity of these enzymes in promastigotes from 23 *L. braziliensis* isolates as a possible parasite-related factor that could influence the clinical outcome of the disease.

**Methodology/Principal Findings:** Our results show that the isolates differ in their ability to hydrolyze adenine nucleotides. Furthermore, we observed a positive correlation between the time for peak of lesion development in C57BL/6J mice and enzymatic activity and clinical manifestation of the isolate. In addition, we found that *L. (V.) braziliensis* isolates obtained from mucosal lesions hydrolyze higher amounts of adenine nucleotides than isolates obtained from skin lesions. One isolate with high (PPS6m) and another with low (SSF) ecto-nucleotidase activity were chosen for further studies. Mice inoculated with PPS6m show delayed lesion development and present larger parasite loads than animals inoculated with the SSF isolate. In addition, PPS6m modulates the host immune response by inhibiting dendritic cell activation and NO production by activated J774 macrophages. Finally, we observed that the amastigote forms from PPS6m and SSF isolates present low enzymatic activity that does not interfere with NO production and parasite survival in macrophages.

**Conclusions/Significance:** Our data suggest that ecto-nucleotidases present on the promastigote forms of the parasite may interfere with the establishment of the immune response with consequent impaired ability to control parasite dissemination and this may be an important factor in determining the clinical outcome of leishmaniasis.

**Citation:** Leite PM, Gomes RS, Figueiredo AB, Serafim TD, Tafuri WL, et al. (2012) Ecto-Nucleotidase Activities of Promastigotes from *Leishmania (Viannia) braziliensis* Relates to Parasite Infectivity and Disease Clinical Outcome. PLoS Negl Trop Dis 6(10): e1850. doi:10.1371/journal.pntd.0001850

**Editor:** Diane McMahon-Pratt, Yale School of Public Health, United States of America

**Received:** January 16, 2012; **Accepted:** August 22, 2012; **Published:** October 11, 2012

**Copyright:** © 2012 Leite et al. This is an open-access article distributed under the terms of the Creative Commons Attribution License, which permits unrestricted use, distribution, and reproduction in any medium, provided the original author and source are credited.

**Funding:** This work was funded by Conselho Nacional de Desenvolvimento Científico e Tecnológico (CNPq) and Fundação de Amparo à Pesquisa do Estado de Minas Gerais (FAPEMIG/PRONEX). The funders had no role in study design, data collection and analysis, decision to publish, or preparation of the manuscript.

**Competing Interests:** The authors have declared that no competing interests exist.

\* E-mail: afonso@nupeb.ufop.br

## Introduction

*Leishmania* is the etiological agent of leishmaniasis, a parasitic disease with diverse clinical manifestations in human beings and other mammals. The parasite presents two main stages in their life cycle: the flagellated mobile promastigote, which multiply in the midgut of the sandfly vector and non-motile amastigotes, obligate intracellular forms that live inside host macrophages. This cell differentiation involves numerous changes and is crucial for *Leishmania* pathogenicity [1,2]. *Leishmania braziliensis* is the species responsible for the majority of cases of human cutaneous leishmaniasis (CL) in Brazil; usually it causes single self-limited

cutaneous ulcers at the site of parasite delivery; however, parasites may also metastasize and produce mucosal lesions, usually in mouth, nose, pharynx, and larynx. The mucosal involvement may occur simultaneously to the cutaneous disease (mucocutaneous form) or months to years after the spontaneous or treatment-induced healing of the cutaneous lesion (mucosal form). In both situations mucosal involvement is serious but the latter more often leads to destructive mucosal involvement with disfiguring scars [3]. In humans, resistance to infection by *L. (V.) braziliensis* is associated with the early establishment of a type 1 immune response along with the control of exacerbated inflammatory responses [4–6]. In murine models of infection, interferon gamma (IFN- $\gamma$ ) has been

## Author Summary

Cutaneous leishmaniasis is a widespread tropical disease caused by different species of *Leishmania* protozoa that are transmitted by infected sandflies. Clinical presentations are extremely diverse and dependent on a variety of parasite and host factors that are poorly understood. *Leishmania (V.) braziliensis* infection may result in a devastating disease manifestation characterized by the development of destructive lesions in the oral, nasal, and pharyngeal mucosal. Ecto-nucleotidases are enzymes that are involved in the hydrolysis of extracellular nucleotides. These enzymes have been shown to correlate with virulence of *Leishmania* parasites. In this work, we evaluated the ecto-nucleotidase activity of promastigotes from the twenty three different *L. braziliensis* isolates. We demonstrated that isolates obtained from mucosal lesions present higher levels of ecto-nucleotidase activity than those from cutaneous lesions. In addition, we show that in the murine model of cutaneous leishmaniasis, promastigote forms of parasite with higher activity induce a delayed/decreased immune response that may correlate with spreading of the parasites throughout the body. Thus, we propose that the level of ecto-nucleotidase activity of promastigotes may be a marker for the development of severe clinical forms of cutaneous leishmaniasis and also a possible target for future therapeutic intervention.

shown to act in synergy with another macrophage derived cytokine, tumor necrosis factor alpha (TNF- $\alpha$ ), in activating macrophages to synthesize nitric oxide (NO), a potent microbicidal agent that leads to killing of intracellular parasites [7,8].

Factors or mechanisms leading to the diversity of clinical presentations are not well known. Although the involvement of host immune response [4,5,9–12], and, a limited number of parasite factors also have lately been recognized as important [13,14].

Several virulence factors have been associated with the establishment of *Leishmania* infection, including lipophosphoglycan (LPG), gp63 and other proteases. These factors are involved in the establishment of intracellular parasitism as well as in the inhibition of host immune response [15,16]. Components of extracellular ATP metabolism pathway are emerging candidates to determine the virulence of these parasites, since ATP and adenosine (Ado), a product of AMP hydrolysis, are able to influence the immunological response of the host and, in consequence, the parasite establishment [17–21].

Due to their incapacity to *de novo* synthesize purine nucleotides, *Leishmania* parasites need to obtain extracellular nucleotides to feed the salvation pathway for purine nucleotides synthesis. This is achieved through the action of extracellular enzymes [22], amongst them, the ecto-nucleoside triphosphate diphosphohydrolase (E-NTPDase or apyrase) which will hydrolyze ATP to ADP and then to AMP and the 5'-nucleoside monophosphate phosphohydrolase (5'-nucleotidase or 5'-NT), which produces Ado by removing the phosphate group from AMP. Ado is, then internalized via specific transporters [23].

An increase in the levels of extracellular ATP is interpreted by the immune system as a danger signal and triggers an inflammatory response [24]. On the other hand, extracellular Ado, acting on P1 receptors, modulates the inflammatory response by increasing the intracellular cAMP concentration [25].

Previous studies from our group corroborate the hypothesis that enzymes involved in the extracellular metabolism of nucleotides

can also act as virulence factors for parasites. In a comparative study with metacyclic promastigotes of *Leishmania (Leishmania) amazonensis*, *Leishmania (Leishmania) major* and *L. (V.) braziliensis*, a potential correlation between enzymatic activity and virulence *in vivo* was demonstrated [18]. More recently, we demonstrated that long-term culture of *L. (L.) amazonensis* promastigotes results in a decreased ability to hydrolyze nucleotides that is associated with loss of virulence [17].

Since ecto-nucleotidases have a crucial role in metabolism of extracellular nucleotides, which can be correlated to parasitism and the development of infection, we focused our study on the activity of these enzymes in *L. (V.) braziliensis* isolates from patients as a possible parasite-related factor that could influence the clinical presentation of disease. Moreover, we also examined whether ecto-nucleotidases can be correlated with the control of immune response in the infection of C57BL/6J mice and J774-macrophages, as well as the infection and activation of dendritic cells (DC). Our results show that parasites with high ecto-nucleotidase activity are able to modulate the host immune response by inhibiting macrophage microbicidal mechanisms and DC activation. In addition, we observed that promastigotes from the *L. (V.) braziliensis* isolates obtained from mucosal lesions hydrolyze higher amounts of adenine nucleotides than isolates obtained from cutaneous lesions, indicating that differences in the enzymatic activity may influence disease outcome in patients with *L. (V.) braziliensis* infection.

## Methods

### Animals and Parasites

Female C57BL/6J mice (4–8 weeks old) were obtained from the University's animal facility. Animals were given water and food *ad libitum*. The *L. (Viannia) braziliensis* parasites were obtained from the Oswaldo Cruz Institute *Leishmania* collection (Coleção de *Leishmania* do Instituto Oswaldo Cruz, CLIOC), Leishmaniasis Immunobiologic Bank (Leishbank) of the Brazilian Mid-West region in the Tropical Pathology and Public Health Institute, Federal University of Goiás (UFG) and Centro de Referências em Leishmanioses do Centro de Pesquisas René Rachou-Fiocruz (CRL-CPqRR) (Table 1). Clinical forms used in the study were those defined by the cell bank from where the isolates were obtained. Parasites were cultured in Grace's insect medium (Sigma-Aldrich, St. Louis, MO, USA) supplemented with 10% heat-inactivated fetal calf serum (FCS – LGC, Cotia, SP, Brazil), 2 mM L-glutamine (Gibco BRL, Grand Island, NY, USA) and 100 U/mL penicillin G potassium (USB Corporation, Cleveland, OH, USA), pH 6.5, at 25°C. Parasites were kept in culture for no more than twenty passages. Metacyclic promastigotes were purified by gradient centrifugation of parasites at the stationary phase of culture (day 5) over Ficoll 400 (Sigma-Aldrich), as previously described [18]. The amastigote forms were obtained from J774 infected macrophages as previously described [26] except for the modification of the incubation temperature of the suspension containing the macrophages and the parasites (33°C).

### Ethics Statement

The protocols to which animals were submitted were approved by the Universidade Federal de Ouro Preto Ethical Committee on Animal Experimentation (OFiCIO CEP N°. 005/2009) and followed the guidelines from the Canadian Council on Animal Care.

**Table 1.** Strains of *Leishmania* used in this study.

| Isolates <sup>a</sup>               | Clinical form | Geographical origin | Identification by        |
|-------------------------------------|---------------|---------------------|--------------------------|
| IOC -L 2463, MHOM/BR/2001/JOLIVAL   | Mucocutaneous | Bahia               | CLIOC <sup>b</sup>       |
| IOC -L 2468, MHOM/BR/2001/LTCP14183 | Mucocutaneous | Bahia               | CLIOC                    |
| IOC -L 2480, MHOM/BR/2001/LTCP13980 | Mucocutaneous | Bahia               | CLIOC                    |
| IOC -L 2481, MHOM/BR/2000/LTCP13490 | Cutaneous     | Bahia               | CLIOC                    |
| MHOM/BR/2009/ASL (ASL9m)            | Mucosal       | Goiás               | IPTSP/UFG <sup>c</sup>   |
| MHOM/BR/2009/ILM (ILM9m)            | Mucosal       | Goiás               | IPTSP/UFG                |
| MHOM/BR/2008/JBC (JBC8m)            | Mucosal       | Goiás               | IPTSP/UFG                |
| MHOM/BR/2006/PPS (PPS6m)            | Mucosal       | Bahia               | IPTSP/UFG                |
| MHOM/BR/2006/EFSF (EFSF6)           | Cutaneous     | Goiás               | IPTSP/UFG                |
| MHOM/BR/2010/GVN (GVN10)            | Cutaneous     | Amapá               | IPTSP/UFG                |
| MHOM/BR/2006/HPV (HPV6)             | Cutaneous     | Tocantins           | IPTSP/UFG                |
| MHOM/BR/2003/IMG (IMG3)             | Cutaneous     | Goiás               | IPTSP/UFG                |
| MHOM/BR/2005/RPL (RPL5)             | Cutaneous     | Pará                | IPTSP/UFG                |
| AMAC                                | Cutaneous     | Minas Gerais        | CRL - CPqRR <sup>d</sup> |
| CHP                                 | Cutaneous     | Minas Gerais        | CRL - CPqRR              |
| ET                                  | Cutaneous     | Minas Gerais        | CRL - CPqRR              |
| JRG                                 | Cutaneous     | Minas Gerais        | CRL - CPqRR              |
| LCA                                 | Cutaneous     | Minas Gerais        | CRL - CPqRR              |
| NSL                                 | Cutaneous     | Minas Gerais        | CRL - CPqRR              |
| RS                                  | Cutaneous     | Minas Gerais        | CRL - CPqRR              |
| SAP                                 | Cutaneous     | Minas Gerais        | CRL - CPqRR              |
| SSF                                 | Cutaneous     | Minas Gerais        | CRL - CPqRR              |
| WLC                                 | Cutaneous     | Minas Gerais        | CRL - CPqRR              |

<sup>a</sup>*L. (Viannia) braziliensis*.

<sup>b</sup>CLIOC: *Leishmania* Type Culture Collection, Instituto Oswaldo Cruz.

<sup>c</sup>IPTSP/UFG: Leishmaniasis Immunobiologic Bank (Leishbank) of the Brazilian Mid-West region in the Tropical Pathology and Public Health Institute, Federal University of Goiás (UFG).

<sup>d</sup>CRL - CPqRR: Centro de Pesquisas René Rachou-Fiocruz.

doi:10.1371/journal.pntd.0001850.t001

All isolates were obtained from pre-established collections from anonymized samples. IRB approval is not required for the use of the parasite isolates and hence not sought.

### Enzymatic activity measurement

ATPase, ADPase and 5'-nucleotidase activities were measured by incubation of intact parasites for 1 hr at 30°C in a mixture containing 116 mM NaCl, 5.4 mM KCl, 5.5 mM D-glucose, 5 mM MgCl<sub>2</sub>, and 50 mM HEPES-Tris buffer, in the presence of ATP, ADP or AMP (Sigma-Aldrich) 5 mM [27]. The reaction was started by the addition of living stationary phase promastigotes or amastigotes isolated from infected J774 macrophages and terminated by the addition of ice cold HCl 0.2 M [28]. Nonspecific hydrolysis was determined by adding the parasites after the reaction was stopped. Parasite suspensions were pelleted and aliquots of supernatant were used for the measurement of released inorganic phosphate (Pi) as previously described [29]. Enzymatic activities were expressed as nmol of Pi released by 1.0 × 10<sup>8</sup> parasites in 1 hr.

### Infection

C57BL/6J mice were inoculated in the left hind footpad with 1.0 × 10<sup>7</sup> stationary phase promastigotes and lesion development was followed weekly with a dial micrometer (Serie 7; NO. 7301; Mitutoyo). The results were expressed as the difference between

measures of infected and contra lateral non-infected footpad [30].

### Parasite load estimation

The number of parasites in the footpad was estimated by a limiting dilution assay [30]. Mice were sacrificed and the whole lesion was removed and ground in Grace's insect medium, pH 6.5, in a glass tissue grinder. Tissue debris was removed by centrifugation at 50 × g at 4°C/1 min, and supernatant was transferred to another tube and centrifuged at 1540 × g at 4°C/15 min. The pellet was resuspended in 0.5 mL Grace's insect medium supplemented with 10% heat-inactivated FCS, 2 mM L-glutamine and 100 U/mL penicillin G potassium, pH 6.5. Parasite suspension was, then, serially diluted in duplicates in a final volume of 200 µL in 96-well plates. Pipette tips were replaced for each dilution. Plates were incubated for 15 days at 25°C and examined under an inverted microscope for the presence of parasites. Results were expressed as -log of the parasite titer corresponding to the last dilution in which parasites were detected.

### Histology and immunohistochemistry

Footpad lesions from C57BL/6J mice were harvested, embedded in paraffin and 4 µm-thick sections stained with hematoxylin and eosin (HE) and examined under a light microscope. Deparaffined slides were hydrated and incubated with 4%

hydrogen peroxide (30vv) in 0.01 M Phosphate Buffered Saline (PBS; pH 7.2) to block endogenous peroxidase activity, followed by incubation with normal goat serum (1:100 dilution) to block non-specific immunoglobulin absorption. Heterologous hyperimmune serum from rabbit inoculated with *Leishmania infantum* extract [31] was diluted 1:800 with BSA 0.1% and employed as the primary antibody. Slides were incubated in a humid chamber at 4°C for 18–22 h, washed with PBS, incubated with biotinylated goat anti-mouse and anti-rabbit Ig (Dako, Carpinteria, CA, 192 USA; LSAB2 kit), washed in PBS, and incubated with streptavidin-peroxidase complex (Dako; LSAB2 kit) for 20 min at room temperature. Slides were treated with 0.024% diaminobenzidine (Sigma-Aldrich) and 0.16% hydrogen peroxidase (30vv), dehydrated, cleared, counterstained with Harris's hematoxylin and mounted with cover slips [31]. The images were captured in a Leica DM5000B microscope with a coupled camera DFC300FX using the program Leica Application Suite (version 2.4.0 R1, Leica Microsystems Ltd., Heerbrugg, Switzerland).

### Infection of J774 cells

J774 cells were plated at  $1 \times 10^6$  cells/mL onto round coverslips in Dulbecco's minimal essential medium (Sigma-Aldrich) containing 10% FCS, 2 mM L-glutamine, 100 U/mL penicillin G potassium, 25 mM N-2-hydroxyethylpiperazine-N'-2-ethanesulfonic acid (HEPES; Sigma-Aldrich) and 50  $\mu$ M  $\beta$ -mercaptoethanol (Pharmacia Biotech AB, Uppsala, Sweden) in 24-well plates. Cells were incubated for 90 min at 37°C, 5% CO<sub>2</sub>. Non-adherent cells were removed by washing with warm phosphate-buffered saline (PBS). Promastigotes or amastigotes isolated from infected J774 macrophages were added to the culture at a 5:1 parasite to cell ratio. After 3 hr co-culture, cells were washed with PBS to remove non-internalized parasites and coverslips were collected to evaluate infectivity. Fresh medium was added to the cultures and the macrophages were stimulated with 10 U/mL IFN- $\gamma$  and 100 pg/mL lipopolysaccharide (LPS). After 72 hr, coverslips were collected for evaluation of infectivity and supernatants were collected for measurement of nitrite and interleukin-10 (IL-10).

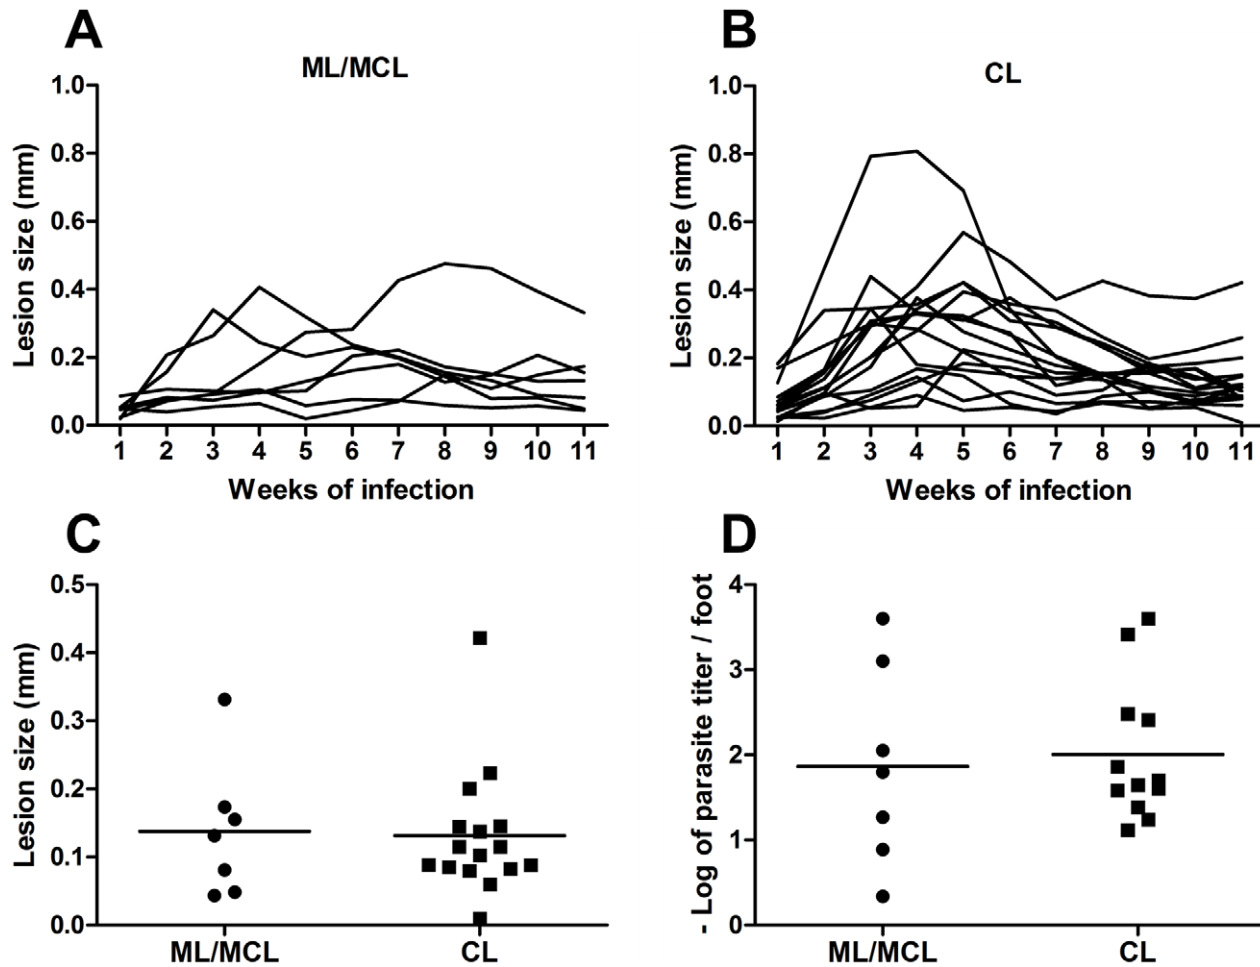

**Figure 1. Course of infection of *Leishmania (V.) braziliensis* isolates in C57BL/6J mice.** C57BL/6J mice were inoculated in the footpad of the left hind leg with  $10^7$  promastigotes obtained from mucosal (ML)/mucocutaneous (MCL) lesions (A) or cutaneous lesions (CL) (B). Lesion sizes were measured weekly. The lesion size was defined as the difference between the infected and uninfected contralateral footpad from two independent experiments with four mice per group with the exception of isolates RS, SAP, IMG3 and RPL5 (one experiment each). Each line represents a distinct isolate and was drawn based on the mean lesion size for each time point. Error bars were not included to facilitate visualization. Eleven weeks after infection, animals were sacrificed and the relationship between lesion size and clinical form (C) as well the parasite load by limiting dilution technique was determined (D). Each point represents a different isolate. The line represents the mean of the group. Statistical analysis was performed by Student's *t*-test.

doi:10.1371/journal.pntd.0001850.g001

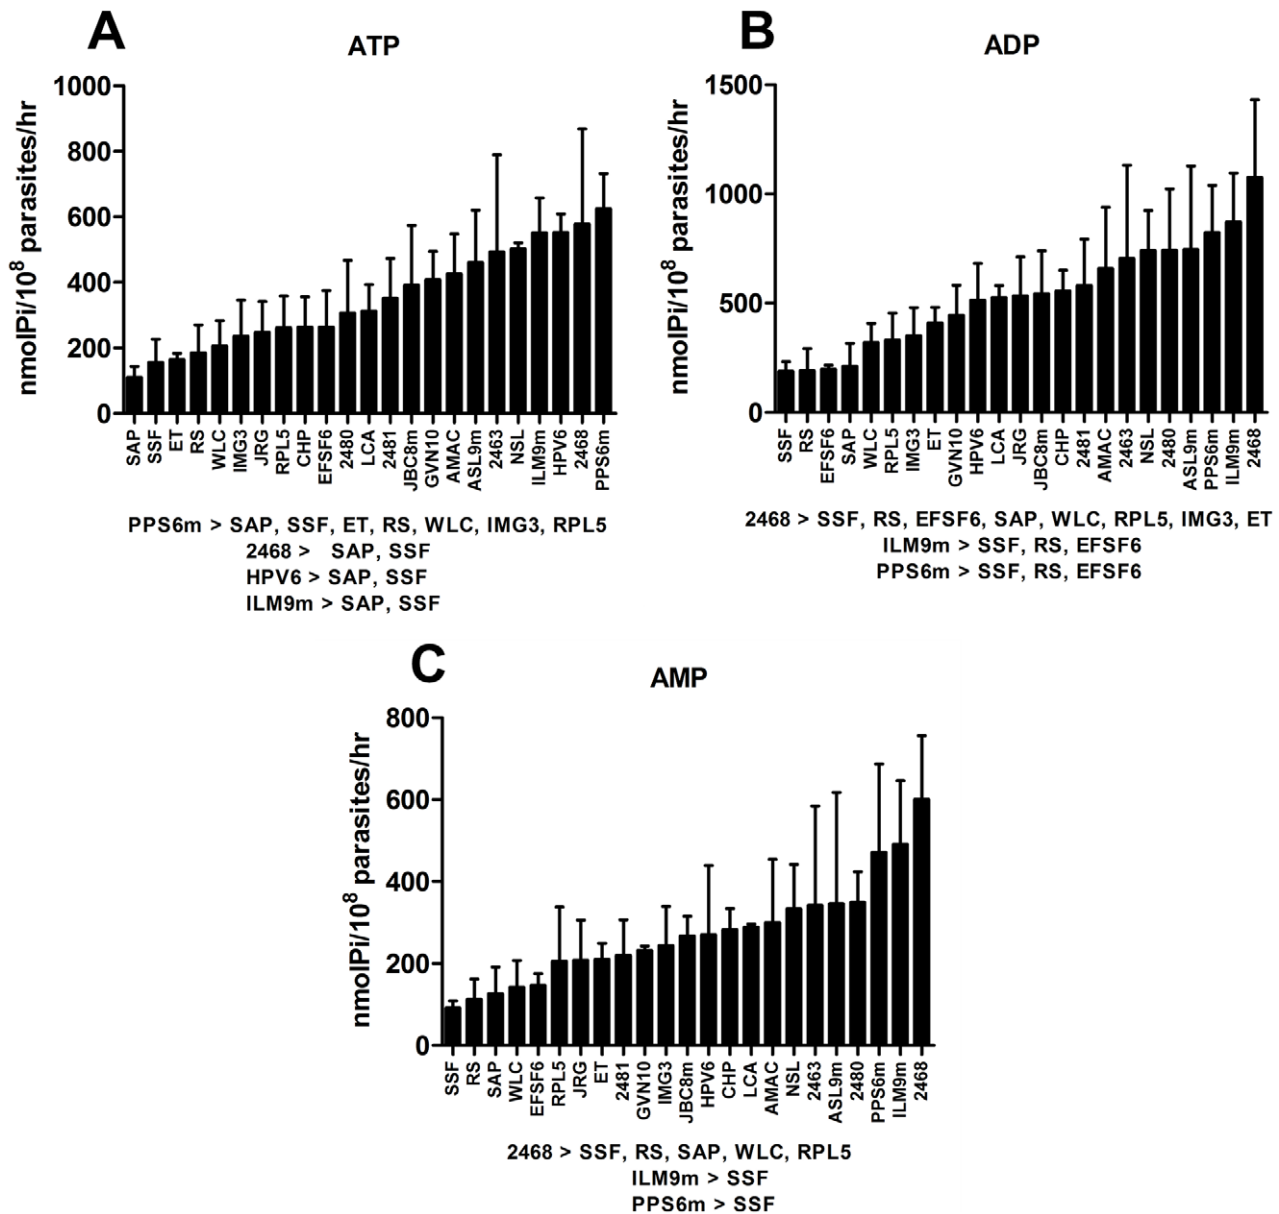

**Figure 2. *L. (V.) braziliensis* isolates differ in their ability to hydrolyze adenine nucleotides.** Promastigotes were isolated on the 5th day of culture and incubated with ATP (A), ADP (B) and AMP (C) for 1 hr at 30°C. Enzymatic activity was evaluated by the measurement of inorganic phosphate released. Bars represent the mean+standard deviation (SD) of three or more independent experiments performed in triplicates. Significant differences are shown below each graph. Statistical analysis was performed by one-way ANOVA followed by Bonferroni post-test. doi:10.1371/journal.pntd.0001850.g002

production. Coverslips were fixed in methanol for 10 min (Vetec Fine Chemistry), dried and stained using the kit Panótico Rápido (Laborclin, Pinhais, PR, Brazil), according to manufacturer's instructions. The analysis was performed using an Olympus BX50 optical microscope (Olympus, Center Valley, PA, USA). The number of infected and uninfected cells and the number of parasites present in infected cells were determined. A minimum of 200 macrophages per coverslip was examined.

Quantification of NO produced by the cells was performed by the indirect Griess method to detect nitrite [32], and the production of IL-10 levels was evaluated by indirect enzyme-linked immunosorbent assay (ELISA) (PeproTech Inc., Rock Hill, NJ, USA), according to manufacturer's specifications, in 72 hr supernatants.

#### DC infection and flow cytometry

Bone-marrow derived dendritic cell (BMDC) were obtained from C57BL/6J bone marrow as previously described [33]. Briefly, bone marrow cells were isolated from the femur and tibia of C57BL/6J mice. The suspension was centrifuged and cells cultured in RPMI-1640 (Sigma-Aldrich) supplemented with 10% FCS, 2 mM L-glutamine, 100 U/mL penicillin G potassium, and 50 μM β-mercaptoethanol, pH 7.2. Cells were plated in Petri dishes at a concentration of  $3 \times 10^5$  cells/mL, and incubated at 37°C/5% CO<sub>2</sub>. Granulocyte-Macrophage Colony-Stimulating Factor (GM-CSF) (R&D Systems, Minneapolis, MN, USA) was added to each plate on the days 0, 3 and 6, at the concentration of 3 ng/mL (1050 U/mL). Non adherent DC were collected on the 9<sup>th</sup> day of culture. 5(6)-carboxyfluorescein diacetate *N*-



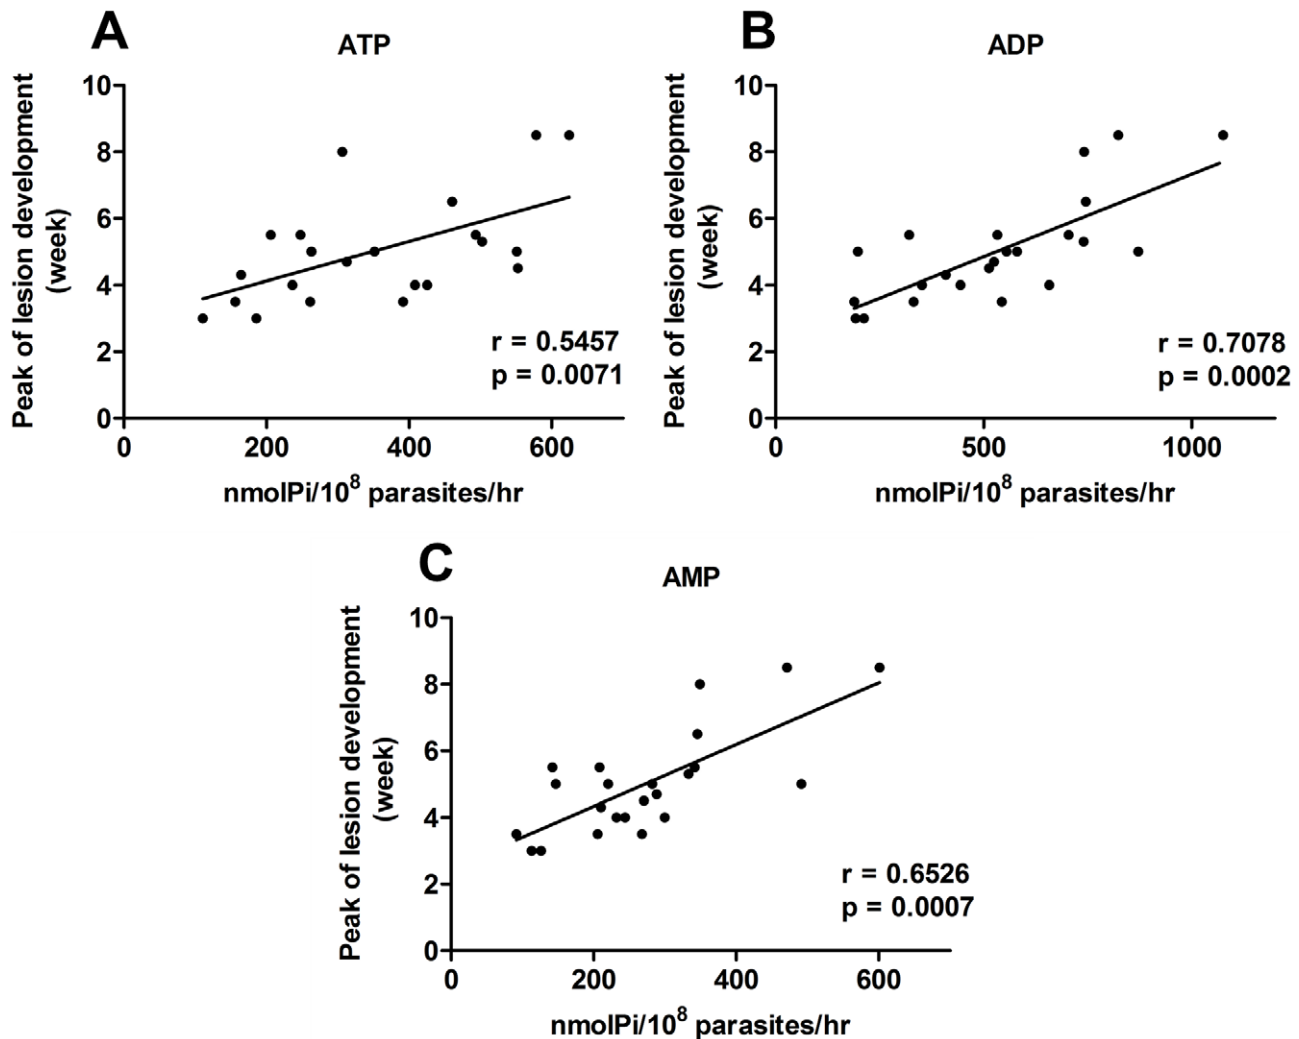

**Figure 3. Ecto-nucleotidase activity of *Leishmania (V.) braziliensis* isolates correlates with peak injury in C57BL/6J mice.** Promastigotes were isolated on the 5th day of culture and incubated with ATP (A), ADP (B) and AMP (C) for 1 hr at 30°C. Enzymatic activity was evaluated by the measurement of inorganic phosphate released. C57BL/6J mice were inoculated in the footpad of the left hind leg with 10<sup>7</sup> promastigotes. Lesion sizes were measured weekly. Data-points represent the mean of the difference between the infected and uninfected contralateral footpad from two independent experiments with four mice per group with the exception of isolates RS, SAP, IMG3 and RPL5 (one experiment each). Correlation coefficient ( $r$ ) calculated by the Spearman's test. doi:10.1371/journal.pntd.0001850.g003

succinimidyl ester (CFSE)-labeled metacyclic promastigotes and BMDCs were co-incubated (1:3 cell to parasite ratio) at 33°C/5% CO<sub>2</sub>/3 hr. To ensure full activation of these cells, LPS (Sigma-Aldrich) at a concentration of 2 µg/mL was then added to the culture and the cells were incubated at 37°C/5% CO<sub>2</sub> for up to 17 hr. Infected BMDCs were submitted to analysis by flow cytometry. For flow cytometry analysis, cells at a concentration of 1×10<sup>7</sup> cells/mL in PBS/1% bovine serum albumin (BSA) were submitted to FcγR blocking in the presence of anti-mouse CD16/CD32 (eBioscience, San Diego, CA, EUA). Twenty-five µL of the cell suspension were incubated with a combination of desired antibodies at 4°C/30 min, protected from light. The antibodies used were: anti-mouse CD11c (HL3 clone – BD Pharmingen, San Diego, CA, EUA), anti-mouse MHCII (M5 114.15.2 clone), anti-mouse CD86 (GL1 clone – eBioscience), and their respective isotype controls. The suspension was centrifuged and the cells were washed in PBS, pH 7.2 and resuspended in a solution of 1% paraformaldehyde, 47.7 mM

sodium cacodylate, and 113 mM NaCl, pH 7.2. The samples were analyzed in BD FACSCalibur™ flow cytometer. Cell acquisition was performed using BD CellQuest™ Pro software. Data analysis was performed using FlowJo software (Tree Star, Ashland, OR, USA).

#### Statistical analysis

Student's *t*-test, ANOVA analysis with Bonferroni post-test and Spearman's test were performed using Prism 5.0 software (GraphPad Software, La Jolla, CA, USA).  $p < 0.05$  was considered statistically significant.

#### Results and Discussion

Infection by *L. (V.) braziliensis* can cause distinct clinical manifestations, amongst which the development of often mutilating mucosal lesions that may cause permanent impairments to the digestive and respiratory tracts. The reasons for the development



increased lesion development and parasitism, resulting in a delay in the control of the infection [18].

The combined action of the promastigote's ecto-nucleotidases may contribute to the delay in the immune response both by decreasing the extracellular ATP concentration as well as increasing the levels of extracellular Ado. It has been demonstrated that the hydrolysis of extracellular ATP and ADP by ecto-NTPDases present in the host cells reduces the concentration of these nucleotides decreasing the activation of P2 receptors which are important stimulators of the immune system. In addition, the subsequent increase in the concentration of Ado may increase the stimulation of P1 receptors, especially the A2A and A2B receptors, which generates an immunosuppressive response [25,49,50]. Thus, reduction of extracellular ATP with subsequent increase in Ado levels by the promastigote's enzymes may facilitate the persistence of *Leishmania* in the host, allowing their multiplication and dissemination to other sites of body, favoring the establishment of infection. In support for this hypothesis, a recent study demonstrated that a decrease in type 1 immune response in patients with disseminated leishmaniasis may account for parasite dissemination due to decreased control of parasite growth [51]. In addition to these ecto-nucleotidases, *Leishmania* parasites also

express a bifunctional enzyme called 3'-nucleotidase/nuclease that may play a significant role in the generation of Ado that may contribute to regulation of the host immune response [52,53].

In order to further investigate the mechanisms underlying the delayed lesion development by parasites with higher ecto-nucleotidase activity, two isolates (PPS6m and SSF) were chosen for subsequent studies of infectivity and immune response in the murine model. As previous studies raised the idea that ecto-nucleotidase activity could be related to virulence in *Leishmania* [17,18,35,41,54] as well as *Toxoplasma gondii* [55], *Trypanosoma cruzi* [42,56] and *Entamoeba histolytica* [57], we inoculated C57BL/6J mice with promastigotes PPS6m and SSF isolates and followed lesion development during 12 weeks. As shown in Figure 6, mice inoculated with PPS6m developed a peak of lesion between the seventh and ninth weeks of infection while mice inoculated with SSF presented their maximum lesion sizes between the third and fifth weeks of infection. In addition, the lesions caused by PPS6m presented a larger parasite load than lesions caused by the SSF isolate at 12 weeks of infection.

It has been demonstrated that, in the murine model of cutaneous leishmaniasis, lesion development, rather than being a direct measure of parasite proliferation, is more related to cell

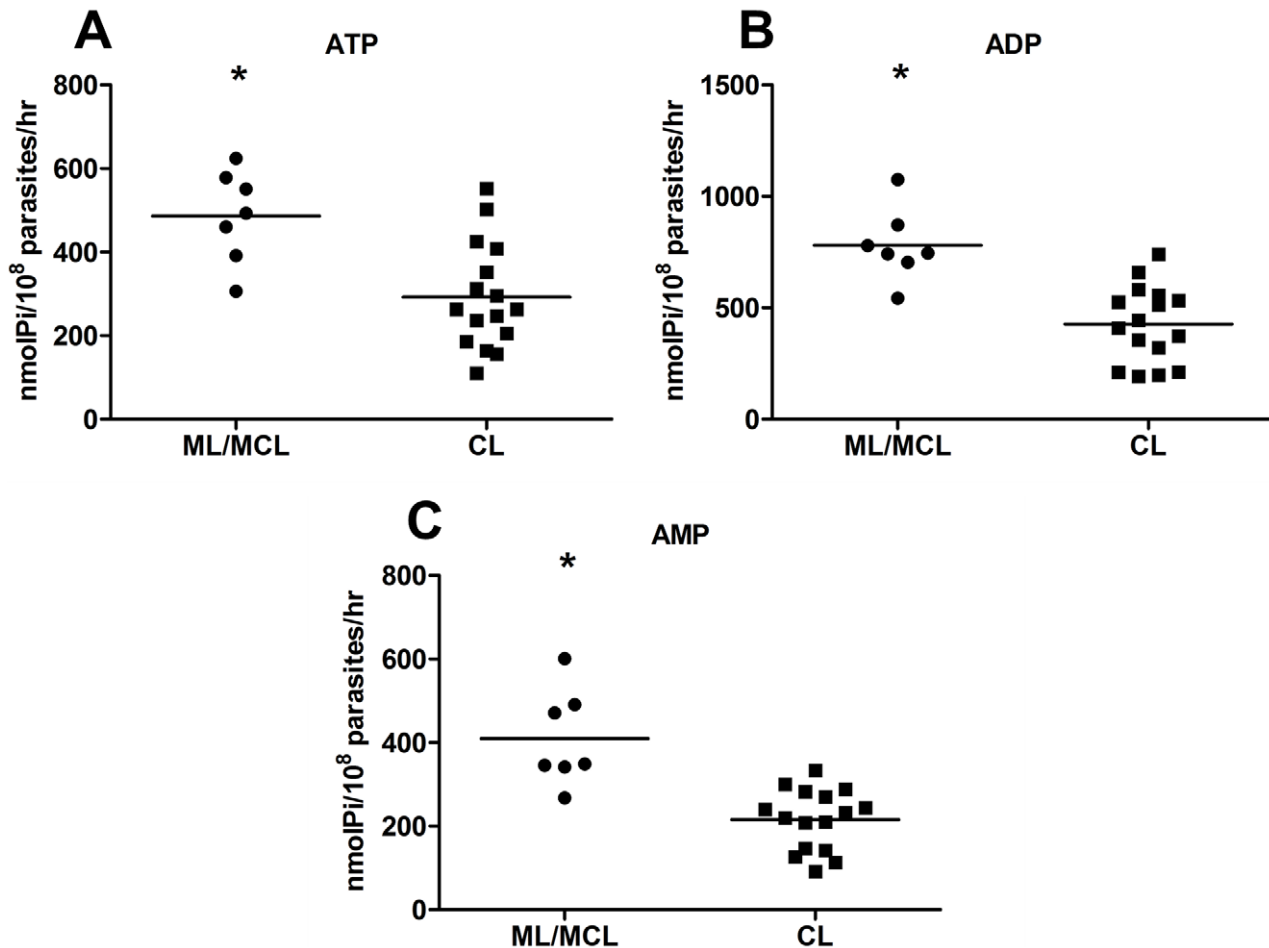

**Figure 5. *Leishmania (V.) braziliensis* isolates obtained from patients with mucosal/mucocutaneous leishmaniasis show higher ecto-nucleotidase activity.** Promastigotes were isolated on the 5th day of culture and incubated with ATP (A), ADP (B) and AMP (C) for 1 h at 30°C. Enzymatic activity was evaluated by the measurement of inorganic phosphate released. Each point represents a different isolate obtained from mucosal (ML)/mucocutaneous (MCL) lesions (A) or cutaneous lesions (CL). The line represents the mean of the group. (\*) indicates statistical difference ( $p < 0.05$ ). Statistical analysis was performed by Student's *t*-test. doi:10.1371/journal.pntd.0001850.g005



migration and development of an immune response [58–60]. Given the differences in lesion development between PPS6m- and SSF-infected mice, we evaluated the levels of parasite proliferation and cellular infiltration at 4 and 8 weeks of infection by histological and immunohistochemical evaluation.

Our results show that, at four weeks of infection, mice inoculated with the PPS6m isolate showed fewer lymphocytes at the site of infection than mice infected with SSF isolate (Figures 7A and E). In addition, at four weeks of infection, parasitism was higher in mice inoculated with PPS6m than in animals infected by SSF (Figures 7C and G). Consistent with a delayed establishment of an immune response, at 8 weeks of infection, mice inoculated with PPS6m presented an intense lymphocytic infiltrate (Figure 7B) which was still associated with elevated parasitism (Figure 7D). At this time point, lesions from SSF inoculated mice, although still presenting a lymphocytic infiltrate, demonstrated evidence of tissue remodeling with very low parasitism (Figures 7F and H). These results corroborate our hypothesis that the level of ecto-nucleotidase activity present in the promastigote modulates the immune response of the host, causing a delay in the migration of lymphocytes to the lesion site.

In view of the critical role DC play in orchestrating the innate and adaptive components of the immune system, we decided to investigate whether the differences in the establishment of the immune response could be attributed to differences in the ability of each isolate to interfere with DC activation and expression of co-stimulatory molecules. To this aim, we infected BMDC with CFSE-labeled metacyclic promastigotes from both isolates and evaluated infectivity and the expression of activation markers after LPS treatment (Figure 8). Our results show that PPS6 infected twice as many BMDC than SSF. In addition, while both isolates decreased DC activation, inhibition of MHCII and CD86 expression by PPS6m was significantly higher than by SSF.

It has been shown that infection of DC by *Leishmania* parasites is associated with the inhibition of cell activation [61–63]. Our results corroborate these findings by showing that *L. (V.) braziliensis*-infected DC are refractory to further activation by

LPS, since the expression of MHCII and CD86 was decreased when compared with uninfected cells. IL-10 has been suggested as a possible factor associated with DC inhibition [64,65]. However, no differences in IL-10 production were detected in macrophages infected by the two isolates (data not shown). Extracellular nucleotides and nucleosides have been shown to affect DC activation and migration. For example, extracellular ATP induces DC maturation and priming of Th1 cells while Ado has been shown to inhibit DC activation and pro-inflammatory cytokine production [66–68]. Activation of A2B Ado receptors has been shown to impair DC maturation and, consequently, decrease their ability to activate other immune cells [25]. Our results show that the isolate with high ecto-nucleotidase activity (PPS6m) presents greater capacity to inhibit the activation of BMDC, showing a possible correlation between the decreased expression of activation markers on infected DC and extracellular Ado production by ecto-nucleotidases present in *L. (V.) braziliensis* promastigotes.

Macrophages play a double role during *Leishmania* infection. At the same time they are responsible for parasite clearance, they also harbor the parasite allowing its multiplication in the susceptible host. To further characterize the interactions between the parasites and the host, we evaluated the *in vitro* infectivity of isolates with different ecto-nucleotidase activity in J774-macrophages (Figure 9). No differences were observed between the isolates PPS6m and SSF with regard to their ability to proliferate in J774 cells in the absence of activation by IFN- $\gamma$  plus LPS. Macrophage activation prevented multiplication of parasite from both isolates (Figure 9B), however, the percentage of macrophages infected by the SSF isolate after 72 hr after activation by IFN- $\gamma$  plus LPS was significantly reduced (Figure 9A) indicating that some cells were able to completely eliminate their parasites. The reasons for this ability of some cells to completely eliminate infection while other cells remain infected are unclear. Importantly, the reduction in the percentage of infected macrophages after activation was not observed in PPS6m infected cells. No differences in IL-10 production by cells infected with both isolates were observed (data not shown). However, while activation of macrophages led to

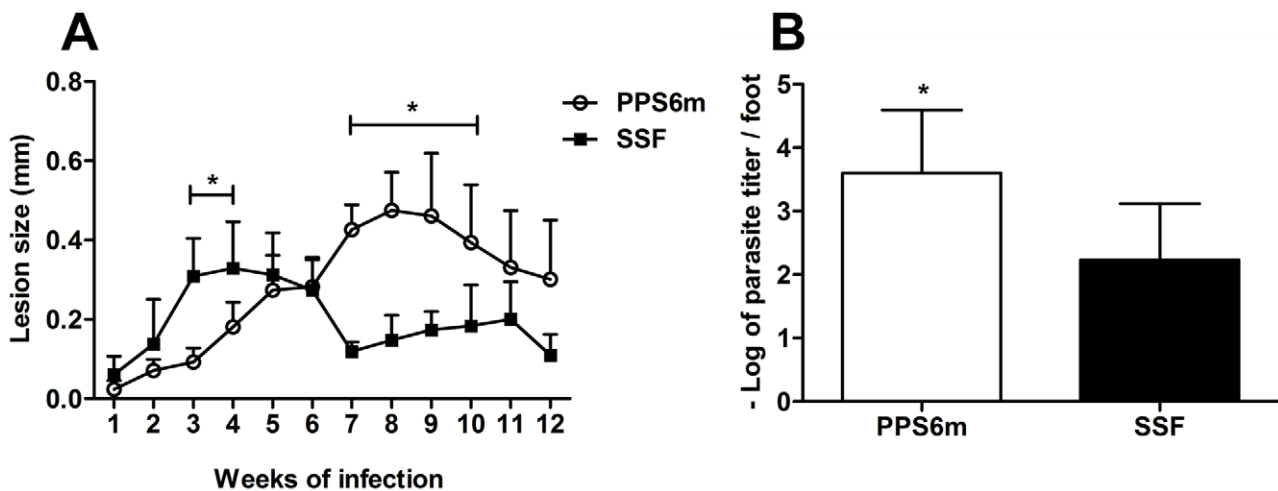

**Figure 6. Isolate with high ecto-nucleotidase activity shows delay in lesion development in C57BL/6J mice.** C57BL/6J mice were inoculated in the footpad of the left hind leg with  $10^7$  promastigotes (A). Lesion sizes were measured weekly. Data-points represent the mean+SD of the difference between the infected and uninfected contralateral footpad from two independent experiments with four mice per group. (B) Parasite load in lesions. Twelve weeks after infection, animals were sacrificed and the parasite load determined by limiting dilution technique in the infected footpad. Columns represent the mean+SD of the log parasite titer from the lesions of four mice per group from two independent experiments. (\*) indicates statistical difference between isolates. Statistical analysis was performed by two-way ANOVA followed by Bonferroni post-test (A) and Student's *t*-test (B).

doi:10.1371/journal.pntd.0001850.g006

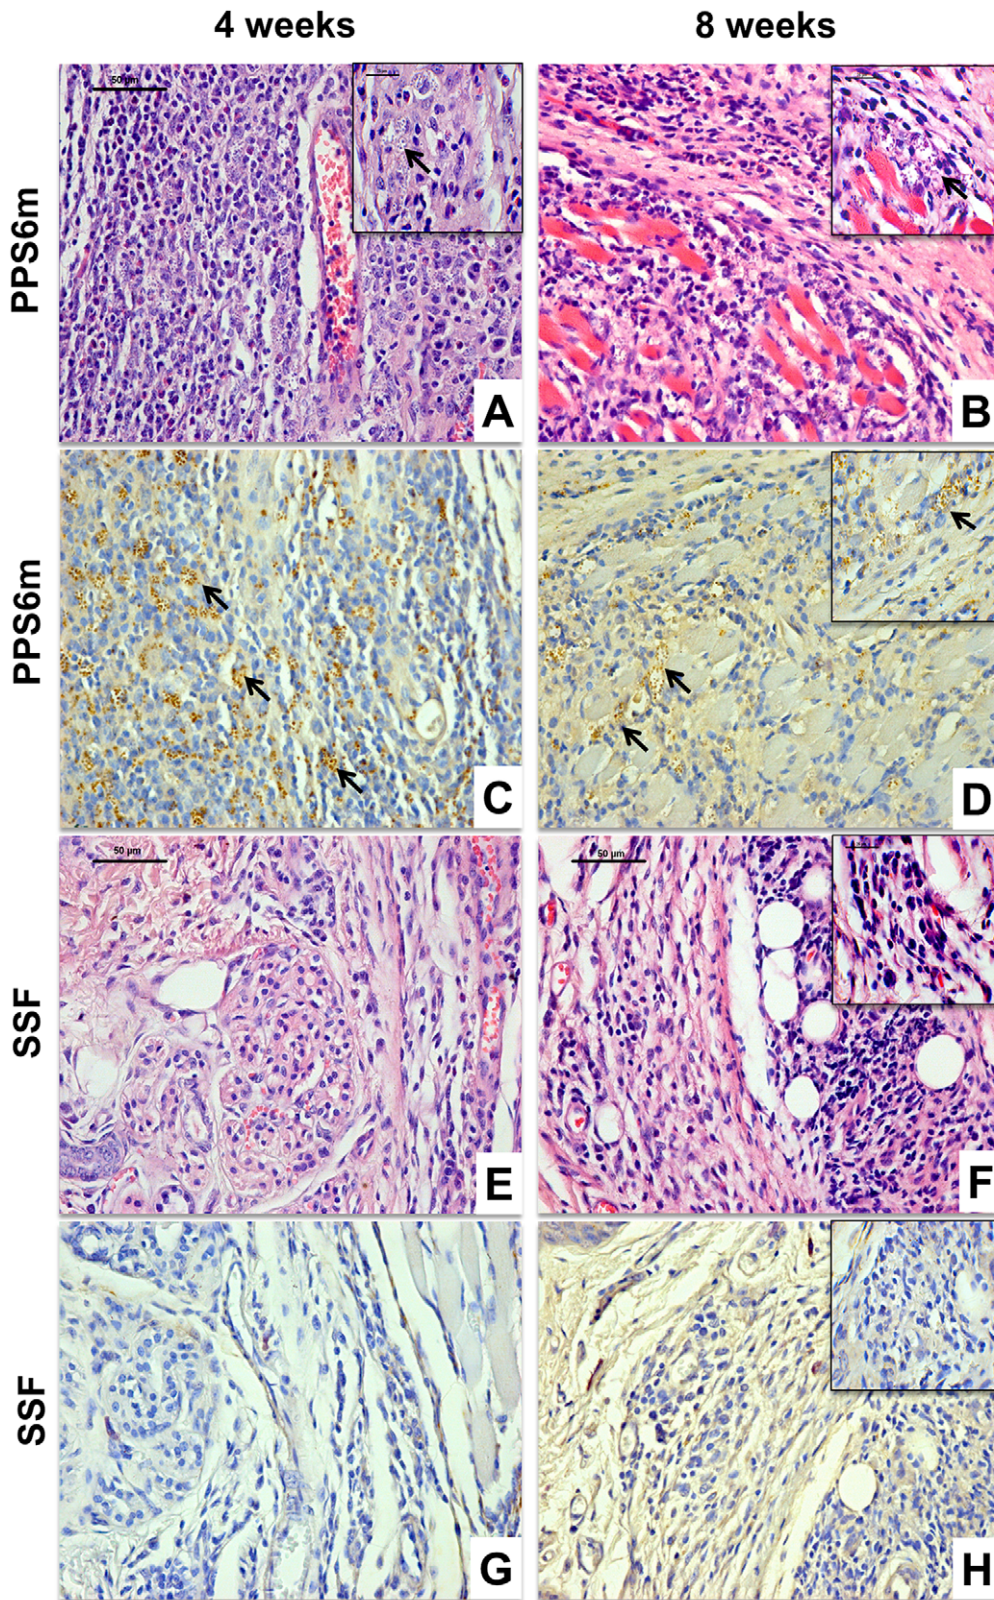

**Figure 7. Histological (4  $\mu$ m, HE) and immunohistochemical evaluation of C57BL/6J mice infected by *L. (V.) braziliensis* isolates.** C57BL/6J mice were inoculated in the footpad of the left hind leg with  $10^7$  promastigotes from PPS6m (A–D) and SSF (E–H) isolates for 4 (A, C, E and G) and 8 (B, D, F and H) weeks. Bar = 50  $\mu$ m, 40 $\times$ . Insert: Bar = 25  $\mu$ m, 100 $\times$ . Arrows indicate the presence of amastigotes. Figures are representative of the Histological (A, B, E and F) and immunohistochemical evaluation (C, D, G and H) of at least two independent experiments with four animals per group.

doi:10.1371/journal.pntd.0001850.g007



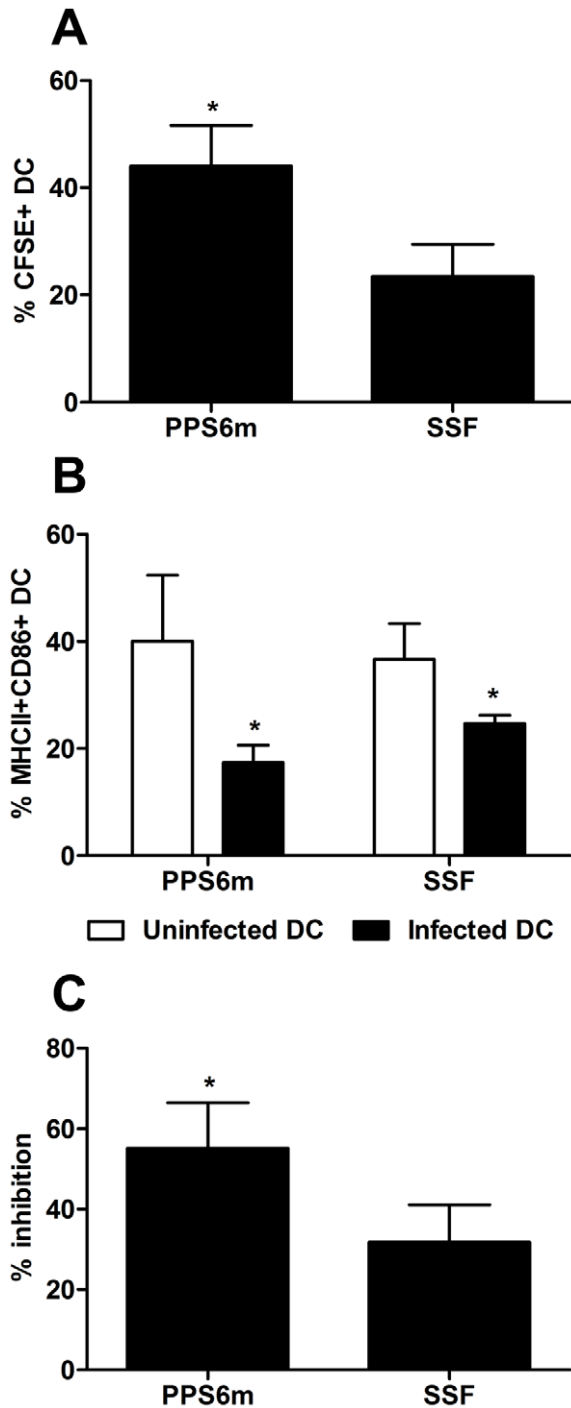

**Figure 8. DC infection and inhibition of activation is increased in PPS6m isolate.** BMDC obtained after 9 days of culture with GM-CSF were infected with CFSE-labeled metacyclic promastigotes (3 parasites/cell). After 3 hr, the cells were stimulated with 2  $\mu$ g/mL LPS and then incubated for up to 17 hr. Finally, DC were analyzed by flow cytometry. DC were gated into populations of uninfected (CFSE<sup>-</sup> cells) and infected (CFSE<sup>+</sup> cells) BMDC, and the surface markers MHCII and CD86 analyzed in both populations. (A) Percentage of CFSE<sup>+</sup> DC. (B) Percentage of MHCII<sup>+</sup>CD86<sup>+</sup> DC. (C) Reduction of MHCII<sup>+</sup>CD86<sup>+</sup> cells in the population DC of uninfected DC compared to uninfected DC. Bars represent the mean $\pm$ SD of three independent experiments. (\*) indicates statistical difference ( $p < 0.05$ ). Statistical analysis was performed by Student's *t*-test.

doi:10.1371/journal.pntd.0001850.g008

a decreased production of nitric oxide in PPS6m infected cells, this was not observed in SSF infected macrophages. Taken together, these results suggest that PPS6m inhibits macrophage activation, even in the presence of IFN- $\gamma$  plus LPS, which leads to increased parasite survival although with limited capacity to multiply within these cells. On the other hand, macrophage activation in SSF-infected cells seems to be more efficient thus leading to decreased percentage of infected cells.

PPS6m and SSF isolates, in addition to present high and low ecto-nucleotidase activity, were isolated, respectively, from mucosal and cutaneous lesions. In order to verify whether the observed effects on parasite survival and NO production were related to the clinical manifestation of the isolate, we performed the same experiments with two other isolates. Isolate HPV6 (obtained from cutaneous lesion) presents high ecto-nucleotidase activity while isolate JBC8m (from mucosal lesion) presents the lower ectonucleotidase activity amongst the mucosal/mucocutaneous isolates. Analysis of Figures 9A to 9C shows that HPV6 presents similar behaviour to PPS6m despite being isolated from cutaneous lesions. On the other hand, JBC8m was susceptible to macrophage activation and did not inhibit NO production similarly to what has been demonstrated to SSF. These results confirm our hypothesis that the level of ecto-nucleotidase activity of the promastigote rather than the clinical manifestation of the isolate is responsible for the resistance to macrophage activation.

The mechanisms leading to inhibition of NO production during *Leishmania* infection are not completely clear, however, molecules present at the parasite surface such as LPG and glycoinositolphospholipids (GIPL) have been shown to interfere with the expression of inducible nitric oxide synthase (iNOS) or NO production after IFN- $\gamma$ +LPS stimulation [69]. We now propose that, the ecto-nucleotidase activity of the promastigote, either directly or indirectly, via the production of Ado, is also involved in macrophage modulation by inhibiting NO production thus contributing to the establishment of infection.

Taken together, the results from macrophage and DC infection by *L. (V.) braziliensis* isolates further corroborate our hypothesis [17,18] that lesion development and parasite multiplication within the host are associated with the level of ecto-nucleotidase activity of the promastigote. Furthermore, the observation that the PPS6m isolate is able to modulate the immune response of the host by inhibiting macrophage and DC activation confirms previous findings of our laboratory with other *Leishmania* species [17,62] and extends these results to *L. (V.) braziliensis* isolates. The inhibition of BMDC activation could explain the delay in mounting an immune response at the beginning of the infection in C57BL/6J mice thus causing the delay in lesion development. In addition, resistance to the initial activation of the macrophage would also allow for extended parasite survival.

*Leishmania* organisms have a relatively simple life cycle, characterized by two principal stages: the flagellated mobile promastigotes living in the gut of the sandfly vector and the immobile amastigotes within phagolysosomal vesicles of the vertebrate host macrophages. Our results indicate the ecto-nucleotidase activity of the promastigote is associated with decreased immune response by the host at the establishment of infection. A limited number of studies evaluated the ectonucleotidase activity in amastigotes. It has been shown that *in vitro* derived amastigotes of *L. (L.) amazonensis* present higher levels of ATP hydrolysis than promastigotes [41] suggesting the possibility of an even more pronounced effect of Ado production on the modulation of the immune response during the chronic phase of the infection. However, no direct assessment of the role of the amastigote's enzymes on the course of infection has been

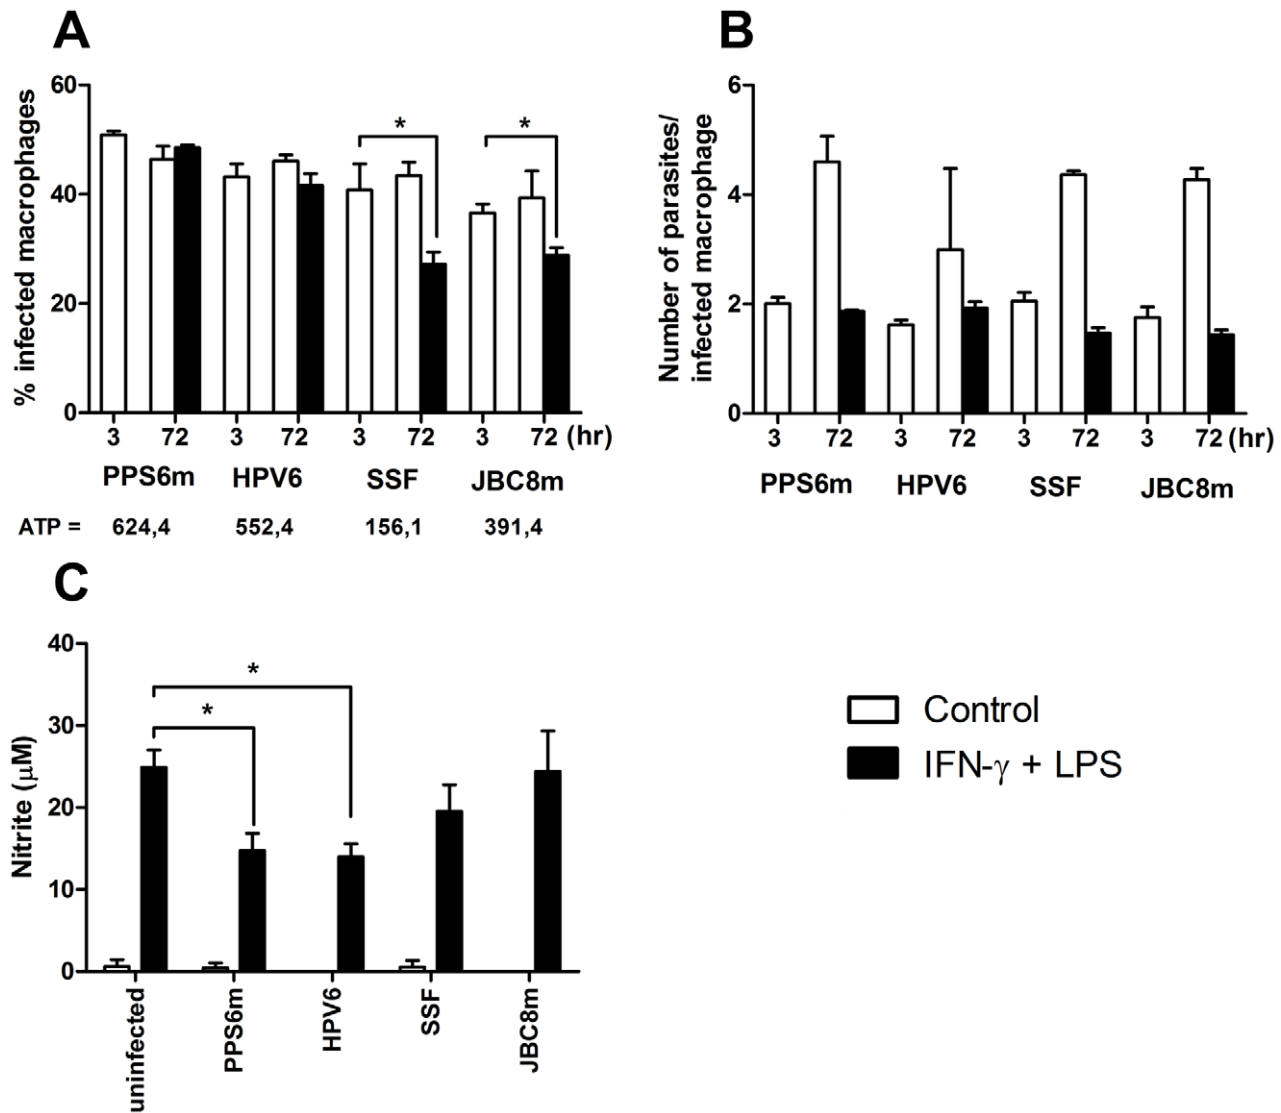

**Figure 9. Promastigotes with high ecto-nucleotidase activity inhibit NO production by activated macrophages.** J774-macrophages were infected with promastigotes of *L. (V.) braziliensis* isolates (5 parasites/cell) for 3 and 72 hr, in presence or not of IFN- $\gamma$ /LPS. (A) Percentage of infected cells and ATPase activity of promastigotes (nmolPi/10<sup>8</sup> parasites/hr). (B) Number of parasites per infected macrophage. (C) NO production in 72 hr supernatants. Bars represent the mean+SD of two independent experiments performed in duplicates. (\*) indicates statistical difference ( $p < 0.05$ ). Statistical analysis was performed by Student's *t*-test. doi:10.1371/journal.pntd.0001850.g009

performed. To determine the role of ecto-nucleotidases in the propagation of the disease, we decided to evaluate the ecto-enzymes activity of amastigotes isolated from infected J774 macrophages.

Contrary to what has been shown for axenic amastigotes [41], our results show that amastigotes obtained from macrophages show very low ecto-nucleotidase activity. The reason from this discrepancy is not known, but could be related to the parasite species (*L. (L.) amazonensis* versus *L. (V.) braziliensis*). Our results also show that PPS6m and SSF amastigotes do not differ in their ability to hydrolyze adenine nucleotides. Furthermore, PPS6m amastigotes presented decreased ecto-nucleotidase activity when compared to the promastigote form of this isolate. (Figures 10A–10C).

Evaluation of amastigote infectivity in J774 macrophages showed that activation of these cells by IFN- $\gamma$  and LPS was able

to control parasite proliferation from both isolates as previously shown for promastigotes (Figure 10E). In addition, amastigotes, which presented less ecto-nucleotidase activity than promastigotes, were not able to down modulate NO production by activated macrophages (Figure 10F). Curiously, however, this inability to reduce NO production did not correlate with a decreased percentage of infection as shown for promastigotes (Figure 10D). These results suggest that a different mechanism of parasite control might be triggered depending on whether the infection is initiated by promastigotes or amastigotes.

It has been demonstrated that the various life-cycle stages have different sensitivities to reactive oxygen species (ROS) and provoke different oxidative responses of the macrophage. Although promastigotes and amastigotes enter the macrophages by phagocytosis, the concomitant oxidative burst is substantially different.

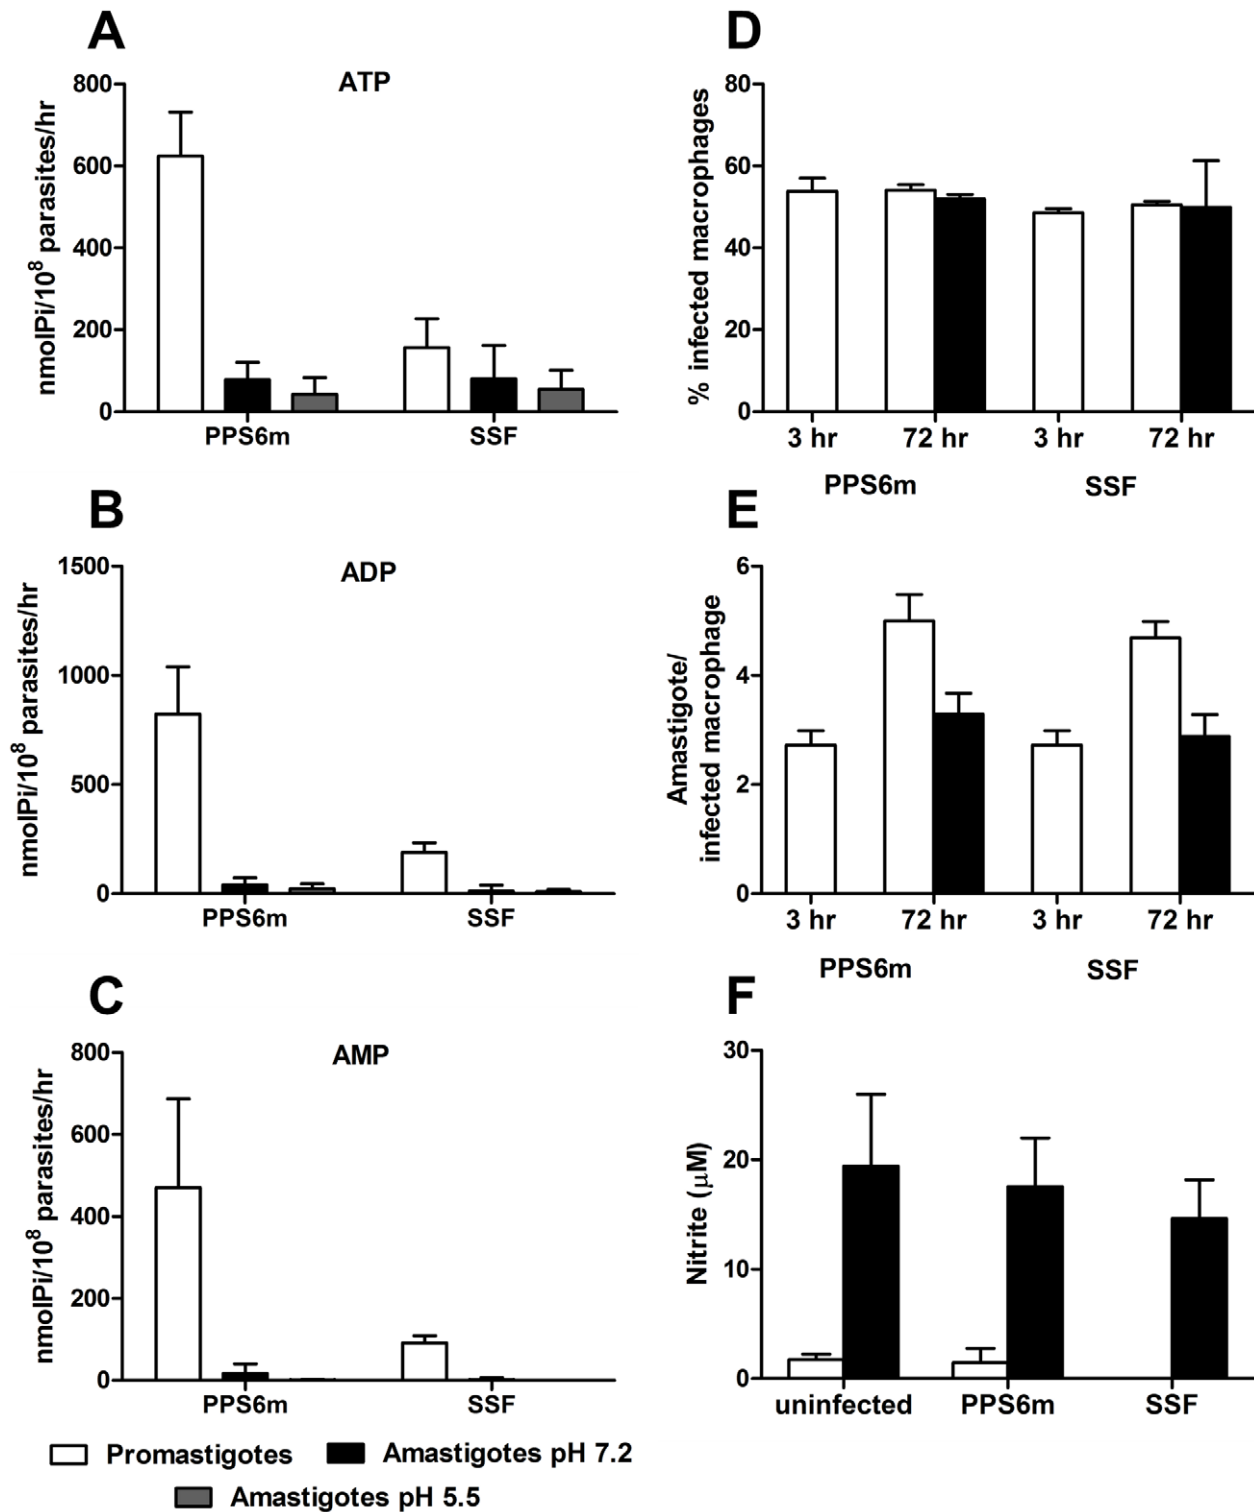

**Figure 10. Ecto-nucleotidase activity and infectivity in J774-macrophages of amastigotes from *L. (V.) braziliensis* isolates.** (A–C) Amastigotes were isolated from infected J774 macrophages and incubated with ATP (A), ADP (B) and AMP (C) for 1 hr at 30°C in pH 7.2 or pH 5.5. Enzymatic activity was evaluated by the measurement of inorganic phosphate released. Bars represent the mean+standard deviation (SD) of three or more independent experiments performed in triplicates. (D–F) J774-macrophages were infected with amastigotes of *L. (V.) braziliensis* isolates (5 parasites/cell) for 3 and 72 hr, in presence or not of IFN- $\gamma$ /LPS. (D) Percentage of infected cells. (E) Number of parasites per infected macrophage. (F) NO production in 72 hr supernatants. Bars represent the mean+SD of two or more independent experiments performed in duplicates. doi:10.1371/journal.pntd.0001850.g010



For both stages, an increase in macrophage superoxide production is seen after infection, but the response is much higher to promastigotes compared to amastigotes [2,70]. In addition, whereas infections of macrophages by promastigote forms of *Leishmania mexicana pijanoi* induce the production of superoxide, infections by amastigotes barely induce superoxide production [71].

Nitric oxide combines with superoxide to form peroxynitrite which has been suggested to be more toxic for the amastigote than NO [2]. Also, *in vitro* studies confirmed that peroxynitrite is cytotoxic to amastigotes forms of parasites whereas nitric oxide is cytostatic [72]. On the other hand *in vitro* infections with promastigotes of *Leishmania major* show that the killing of parasite is mediated only by NO [73].

These observations support our results since NO production is inhibited in macrophages infected with promastigotes with high ecto-nucleotidase activity resulting in increased parasite survival. In infections by amastigotes, which have low ecto-nucleotidase activity, NO production is not inhibited, confirming the role of these enzymes in modulating macrophage activation. However, parasites may survive in the presence of NO, due to the incapacity of this parasite stage to induce ROS production.

Most of the prior studies on the factors that determine the development of mucosal lesions in leishmaniasis focused on the host immune response and the ability of host cells or cytokines to influence the outcome of *Leishmania* infection. In general, patients with mucosal leishmaniasis present an exacerbated inflammatory response associated with high TNF- $\alpha$  and IFN- $\gamma$  and decreased IL-10 production [4]. In addition, decreased response to IL-10 has also been suggested as a possible cause for the intense inflammation at the site of infection [5]. Furthermore, the involvement of Th17 cells associated with the presence of neutrophils [12], high levels of pro-inflammatory monocyte chemoattractant protein (MCP-1) to recruit monocytes [10], exacerbated CD8+ activity [11] and activity of matrix metalloproteinases such as MMP-9 have been described as so important in the pathogenesis of mucosal leishmaniasis. The intrinsic capacity of MMP-9 activation of each individual might influence the intensity of macrophage efflux and dissemination of *L. (V.) braziliensis* infection to different anatomic areas [9]. Taken together, these studies indicate that patients with mucosal lesions develop a highly inflammatory response to the parasite which would seem to contradict our hypothesis. However, due to the intrinsic nature of these studies, they analyzed the patient's response after the establishment of the mucosal lesions and, therefore, cannot account for the role of the parasite in the initial phases of the infection.

The fact that different strains of the same parasite species are able to cause distinct outcomes in isogenic mice (this study and [21,74]) indicates that parasite specific factors may also contribute to the result of the infection. According to Vendrame et al. (2010), the high arginase activity of isolates from mucosal cases suggests that this characteristic favored the development of mucosal lesions and contributed to the survival and proliferation of *Leishmania* in a hostile environment [14]. In addition, isolates obtained from patients with mucosal leishmaniasis are more resistant to NO when compared to isolates obtained from patients with cutaneous leishmaniasis [13]. More recently, it was shown that the infection of *Leishmania* by RNA virus-1 (LRV1) subverted the immune response to infection favoring promote parasite persistence and metastasis [75].

We propose high ecto-nucleotidase activity of the promastigote stage of the parasite as another parasite-related factor that could

influence the clinical presentation of disease. As suggested above, high ecto-nucleotidase activity would decrease extracellular ATP and increase Ado during the initial contact of the parasite with the host at the site of infection, delaying the establishment of the response which would allow for the dissemination of the parasite. Later in the course of infection, the immune response would eventually be established and parasite control achieved. Depending on host related factors, such as decreased IL-10 receptor expression [5], mucosal destruction due to uncontrolled response would occur.

Previous results from our group suggest that early events that occur prior to amastigote transformation have an important role in the course of infection. Thus, inoculation of Ado together with *L. (V.) braziliensis* promastigotes caused an increase in lesion size and parasitism and also a delay in lesion resolution [18]. Furthermore, we also showed that the addition of Ado to *L. (L.) amazonensis* promastigotes culture medium decreases the ecto-nucleotidase activity of the parasite which correlates with decreased lesion size and parasitism [17].

Another intriguing question related to our results is the existence of isolates from cutaneous lesions with high ecto-nucleotidase activity (Figure 5). It is important to note that development of mucosal or mucocutaneous forms of leishmaniasis is generally preceded by single cutaneous lesions. It is tempting to speculate that some of the isolates from CL patients that present high ecto-nucleotidase activity would be able to induce mucosal lesions given the proper host environment. A close monitoring of these patients for decades would be needed to solve this issue.

In summary, our findings suggest that the ecto-nucleotidase activity of *L. (V.) braziliensis* isolates influences lesion development in C57BL/6J mice. The degradation of ATP and subsequent production of Ado is able to create an anti-inflammatory environment that culminates in the inhibition of the activation of DC and macrophage microbicidal mechanisms creating an environment that favors the multiplication of the parasite inside the host cell and its dissemination to other sites of the body. Although the correlation between the activity of ecto-NTPDases and parasite virulence has already been proposed, our results expand on this concept by demonstrating that Ado production may also be important and that this combination may interfere with the clinical outcome of disease. This allows us to suggest that the ecto-nucleotidases can be characterized as a virulence factor of the parasite, indicating not only a marker for the development of the mucosal/mucocutaneous clinical forms, but also a possible target for future therapeutic interventions against *Leishmania* parasites.

## Acknowledgments

The authors wish to thank Leandro Henrique dos Santos and Marcoelio Divino de Souza for technical support in the laboratory, Lucianna Gonçalves Nepomuceno Lemes and Liliane Alves Matos for their help in the experiments. Dr. Miriam Leandro Dorta for characterization of some species of parasites and *Leishmania* Type Culture Collection, Instituto Oswaldo Cruz (CLIOC) for providing us the parasites.

Luís C.C. Afonso, Maria N. Melo, Ana Rabello, Fátima Ribeiro-Dias, Wagner L. Tafuri are research fellows from CNPq.

## Author Contributions

Conceived and designed the experiments: PML JLR LCCA. Performed the experiments: PML RSG ABF TDS SALM CCS. Analyzed the data: PML LCCA. Contributed reagents/materials/analysis tools: AR FRD MAPO MNM WLT. Wrote the paper: PML LCCA.

## References

- Herwaldt BL (1999) Leishmaniasis. *Lancet* 354: 1191–1199.
- Van AT, Deschacht M, da Luz RA, Macs L, Cos P (2011) *Leishmania*-macrophage interactions: insights into the redox biology. *Free Radic Biol Med* 51: 337–351.
- Pirmez C (1992) Immunopathology of American cutaneous leishmaniasis. *Mem Inst Oswaldo Cruz* 87 Suppl 5: 105–109.
- Bacellar O, Lessa H, Schriefer A, Machado P, Ribeiro de JA et al. (2002) Up-regulation of Th1-type responses in mucosal leishmaniasis patients. *Infect Immun* 70: 6734–6740.
- Faria DR, Gollob KJ, Barbosa J, Jr., Schriefer A, Machado PR et al. (2005) Decreased in situ expression of interleukin-10 receptor is correlated with the exacerbated inflammatory and cytotoxic responses observed in mucosal leishmaniasis. *Infect Immun* 73: 7853–7859.
- Antonelli LR, Dutra WO, Almeida RP, Bacellar O, Gollob KJ (2004) Antigen specific correlations of cellular immune responses in human leishmaniasis suggests mechanisms for immunoregulation. *Clin Exp Immunol* 136: 341–348.
- Bogdan C, Rollinghoff M, Diefenbach A (2000) The role of nitric oxide in innate immunity. *Immunol Rev* 173: 17–26.
- Liew FY, Parkinson C, Millott S, Severn A, Carrier M (1990) Tumour necrosis factor (TNF alpha) in leishmaniasis. I. TNF alpha mediates host protection against cutaneous leishmaniasis. *Immunology* 69: 570–573.
- Maretti-Mira AC, de Pinho Rodrigues KM, de Oliveira-Neto MP, Pirmez C, Craft N (2011) MMP-9 activity is induced by *Leishmania braziliensis* infection and correlates with mucosal leishmaniasis. *Acta Trop* 119: 160–164.
- Ramasawmy R, Menezes E, Magalhaes A, Oliveira J, Castellucci L et al. (2010) The -2518 bp promoter polymorphism at CCL2/MCP1 influences susceptibility to mucosal but not localized cutaneous leishmaniasis in Brazil. *Infect Genet Evol* 10: 607–613.
- Tuon FF, Gomes-Silva A, Da-Cruz AM, Duarte MI, Neto VA et al. (2008) Local immunological factors associated with recurrence of mucosal leishmaniasis. *Clin Immunol* 128: 442–446.
- Boaventura VS, Santos CS, Cardoso CR, de AJ, Dos Santos WL et al. (2010) Human mucosal leishmaniasis: neutrophils infiltrate areas of tissue damage that express high levels of Th17-related cytokines. *Eur J Immunol* 40: 2830–2836.
- Giudice A, Camada I, Leopoldo PT, Pereira JM, Riley LW et al. (2007) Resistance of *Leishmania (Leishmania) amazonensis* and *Leishmania (Viannia) braziliensis* to nitric oxide correlates with disease severity in Tegumentary Leishmaniasis. *BMC Infect Dis* 7: 7.
- Vendrame CM, Souza LD, Carvalho MD, Salgado K, Carvalho EM et al. (2010) Insulin-like growth factor-I induced and constitutive arginase activity differs among isolates of *Leishmania* derived from patients with diverse clinical forms of *Leishmania braziliensis* infection. *Trans R Soc Trop Med Hyg* 104: 566–568.
- Cuerpo P, Sobaio-Vahia L, Costa Silva-Filho F, Fernandes O, Cupolillo E et al. (2006) A zymographic study of metalloprotease activities in extracts and extracellular secretions of *Leishmania (Viannia) braziliensis* strains. *Parasitology* 132: 177–185.
- Mosser DM, Brittingham A (1997) *Leishmania*, macrophages and complement: a tale of subversion and exploitation. *Parasitology* 115 Suppl: S9–23.
- de Souza MC, de Assis EA, Gomes RS, Marques da Silva EA, Melo MN et al. (2010) The influence of ecto-nucleotidases on *Leishmania amazonensis* infection and immune response in C57B/6 mice. *Acta Trop* 115: 262–269.
- Marques-da-Silva EA, de Oliveira JC, Figueiredo AB, de Souza Lima JD, Carneiro CM et al. (2008) Extracellular nucleotide metabolism in *Leishmania*: influence of adenosine in the establishment of infection. *Microbes Infect* 10: 850–857.
- Meyer-Fernandes JR, Cosentino-Gomes D, Vieira DP, Lopes AH (2010) Ecto-nucleoside triphosphate diphosphohydrolase activities in trypanosomatids: Possible roles in infection, virulence and purine recycling. *The Open Parasitology Journal* 4: 116–119.
- Paletta-Silva R, Meyer-Fernandes JR (2012) Adenosine and immune imbalance in visceral leishmaniasis: the possible role of ectonucleotidases. *J Trop Med* 2012: 650874.
- Souza VL, Veras PS, Welby-Borges M, Silva TM, Leite BR et al. (2011) Immune and inflammatory responses to *Leishmania amazonensis* isolated from different clinical forms of human leishmaniasis in CBA mice. *Mem Inst Oswaldo Cruz* 106: 23–31.
- Marr JJ, Berens RL, Nelson DJ (1978) Purine metabolism in *Leishmania donovani* and *Leishmania braziliensis*. *Biochim Biophys Acta* 544: 360–371.
- Ye JH, Rajendran VM (2009) Adenosine: an immune modulator of inflammatory bowel diseases. *World J Gastroenterol* 15: 4491–4498.
- la Sala A, Ferrari D, Di Virgilio F, Idzko M, Norgauer J et al. (2003) Alerting and tuning the immune response by extracellular nucleotides. *J Leukoc Biol* 73: 339–343.
- Hasko G, Csoka B, Nemeth ZH, Vizi ES, Pacher P (2009) A(2B) adenosine receptors in immunity and inflammation. *Trends Immunol* 30: 263–270.
- Chang KP (1980) Human cutaneous leishmaniasis in a mouse macrophage line: propagation and isolation of intracellular parasites. *Science* 209: 1240–1242.
- Bisaggio DF, Peres-Sampaio CE, Meyer-Fernandes JR, Souto-Pradon T (2003) Ecto-ATPase activity on the surface of *Trypanosoma cruzi* and its possible role in the parasite-host cell interaction. *Parasitol Res* 91: 273–282.
- Fietto JL, DeMarco R, Nascimento IP, Castro IM, Carvalho TM et al. (2004) Characterization and immunolocalization of an NTP diphosphohydrolase of *Trypanosoma cruzi*. *Biochem Biophys Res Commun* 316: 454–460.
- Taussky HH, Shorr E (1953) A microcolorimetric method for the determination of inorganic phosphorus. *J Biol Chem* 202: 675–685.
- Afonso LC, Scott P (1993) Immune responses associated with susceptibility of C57BL/10 mice to *Leishmania amazonensis*. *Infect Immun* 61: 2952–2959.
- Tafuri WL, Santos RL, Arantes RM, Goncalves R, de Melo MN et al. (2004) An alternative immunohistochemical method for detecting *Leishmania* amastigotes in paraffin-embedded canine tissues. *J Immunol Methods* 292: 17–23.
- Green LC, Ruiz de LK, Wagner DA, Rand W, Istfan N et al. (1981) Nitrate biosynthesis in man. *Proc Natl Acad Sci U S A* 78: 7764–7768.
- Lutz MB, Kukutsch N, Ogilvie AL, Rossner S, Koch F et al. (1999) An advanced culture method for generating large quantities of highly pure dendritic cells from mouse bone marrow. *J Immunol Methods* 223: 77–92.
- Bernardes CF, Meyer-Fernandes JR, Saad-Nehme J, Vannier-Santos MA, Peres-Sampaio CE et al. (2000) Effects of 4,4'-diisothiocyanatostilbene-2,2'-disulfonic acid on *Trypanosoma cruzi* proliferation and Ca(2+) homeostasis. *Int J Biochem Cell Biol* 32: 519–527.
- Berreto-Pinho M, Peres-Sampaio CE, Chrispim PP, Belmont-Firpo R, Lemos AP et al. (2001) A Mg-dependent ecto-ATPase in *Leishmania amazonensis* and its possible role in adenosine acquisition and virulence. *Arch Biochem Biophys* 391: 16–24.
- de Sa Pinheiro AA, Cosentino-Gomes D, Lanfredi-Rangel A, Ferraro RB, de SW et al. (2008) *Giardia lamblia*: biochemical characterization of an ecto-ATPase activity. *Exp Parasitol* 119: 279–284.
- de Souza LM, Thomaz R, Fonseca FV, Panizzutti R, Vecesi AE et al. (2007) *Trypanosoma brucei brucei*: biochemical characterization of ecto-nucleoside triphosphate diphosphohydrolase activities. *Exp Parasitol* 115: 315–323.
- Jesus JB, Lopes AH, Meyer-Fernandes JR (2002) Characterization of an ecto-ATPase of *Trichomonas foetus*. *Vet Parasitol* 103: 29–42.
- Matin A, Khan NA (2008) Demonstration and partial characterization of ecto-ATPase in *Balamuthia mandrillaris* and its possible role in the host-cell interactions. *Lett Appl Microbiol* 47: 348–354.
- Meyer-Fernandes JR (2002) Ecto-ATPases in protozoa parasites: looking for a function. *Parasitol Int* 51: 299–303.
- Pinheiro CM, Martins-Duarte ES, Ferraro RB, Fonseca de Souza AL, Gomes MT et al. (2006) *Leishmania amazonensis*: Biological and biochemical characterization of ecto-nucleoside triphosphate diphosphohydrolase activities. *Exp Parasitol* 114: 16–25.
- Santos RF, Possa MA, Bastos MS, Guedes PM, Almeida MR et al. (2009) Influence of Ecto-nucleoside triphosphate diphosphohydrolase activity on *Trypanosoma cruzi* infectivity and virulence. *PLoS Negl Trop Dis* 3: e387.
- Sissons J, Alsam S, Jayasekera S, Khan NA (2004) Ecto-ATPases of clinical and non-clinical isolates of *Acanthamoeba*. *Microb Pathog* 37: 231–239.
- Tasca T, Bonan CD, De Carli GA, Sarkis JJ, Alderete JF (2005) Heterogeneity in extracellular nucleotide hydrolysis among clinical isolates of *Trichomonas vaginalis*. *Parasitology* 131: 71–78.
- Drosopoulos JH, Broekman MJ, Islam N, Maliszewski CR, Gayle RB, III et al. (2000) Site-directed mutagenesis of human endothelial cell ecto-ADPase/soluble CD39: requirement of glutamate 174 and serine 218 for enzyme activity and inhibition of platelet recruitment. *Biochemistry* 39: 6936–6943.
- Smith TM, Kirley TL (1999) Site-directed mutagenesis of a human brain ecto-apyrase: evidence that the E-type ATPases are related to the actin/heat shock 70/sugar kinase superfamily. *Biochemistry* 38: 321–328.
- Wink MR, Buffon A, Bonan CD, Valenzuela MA, Sarkis JJ et al. (2000) Effect of protein-modifying reagents on ecto-apyrase from rat brain. *Int J Biochem Cell Biol* 32: 105–113.
- Yang F, Hicks-Berger CA, Smith TM, Kirley TL (2001) Site-directed mutagenesis of human nucleoside triphosphate diphosphohydrolase 3: the importance of residues in the apyrase conserved regions. *Biochemistry* 40: 3943–3950.
- Burnstock G (2007) Purine and pyrimidine receptors. *Cell Mol Life Sci* 64: 1471–1483.
- Sitkovsky MV, Ohta A (2005) The 'danger' sensors that STOP the immune response: the A2 adenosine receptors? *Trends Immunol* 26: 299–304.
- Machado PR, Rosa ME, Costa D, Mignac M, Silva JS et al. (2011) Reappraisal of the immunopathogenesis of disseminated leishmaniasis: in situ and systemic immune response. *Trans R Soc Trop Med Hyg* 105: 438–444.
- Vieira DP, Paletta-Silva R, Saraiva EM, Lopes AH, Meyer-Fernandes JR (2011) *Leishmania chagasi*: an ecto-3'-nucleotidase activity modulated by inorganic phosphate and its possible involvement in parasite-macrophage interaction. *Exp Parasitol* 127: 702–707.
- Paletta-Silva R, Vieira DP, Vieira-Bernardo R, Majerowicz D, Gondim KC et al. (2011) *Leishmania amazonensis*: characterization of an ecto-3'-nucleotidase activity and its possible role in virulence. *Exp Parasitol* 129: 277–283.
- Maioli TU, Takane E, Arantes RM, Fietto JL, Afonso LC (2004) Immune response induced by New World *Leishmania* species in C57BL/6 mice. *Parasitol Res* 94: 207–212.

55. Nakaar V, Beckers CJ, Polotsky V, Joiner KA (1998) Basis for substrate specificity of the *Toxoplasma gondii* nucleoside triphosphate hydrolase. *Mol Biochem Parasitol* 97: 209–220.
56. Meyer-Fernandes JR, Saad-Nehme J, Peres-Sampaio CE, Belmont-Firpo R, Bisaggio DF et al. (2004) A Mg-dependent ecto-ATPase is increased in the infective stages of *Trypanosoma cruzi*. *Parasitol Res* 93: 41–50.
57. Barros FS, De Menezes LF, Pinheiro AA, Silva EF, Lopes AH et al. (2000) Ectonucleotide diphosphohydrolase activities in *Entamoeba histolytica*. *Arch Biochem Biophys* 375: 304–314.
58. Belkaid Y, Mendez S, Lira R, Kadambi N, Milon G et al. (2000) A natural model of *Leishmania major* infection reveals a prolonged “silent” phase of parasite amplification in the skin before the onset of lesion formation and immunity. *J Immunol* 165: 969–977.
59. Teixeira MJ, Fernandes JD, Teixeira CR, Andrade BB, Pompeu ML et al. (2005) Distinct *Leishmania braziliensis* isolates induce different paces of chemokine expression patterns. *Infect Immun* 73: 1191–1195.
60. Titus RG, Marchand M, Boon T, Louis JA (1985) A limiting dilution assay for quantifying *Leishmania major* in tissues of infected mice. *Parasite Immunol* 7: 545–555.
61. Carvalho LP, Pearce EJ, Scott P (2008) Functional dichotomy of dendritic cells following interaction with *Leishmania braziliensis*: infected cells produce high levels of TNF-alpha, whereas bystander dendritic cells are activated to promote T cell responses. *J Immunol* 181: 6473–6480.
62. Figueiredo AB, Serafim TD, Marques-da-Silva EA, Meyer-Fernandes JR, Afonso LC (2012) *Leishmania amazonensis* impairs DC function by inhibiting CD40 expression via A<sub>2B</sub> adenosine receptor activation. *Eur J Immunol* 42: 1203–1215.
63. Prina E, Abdi SZ, Lebastard M, Perret E, Winter N et al. (2004) Dendritic cells as host cells for the promastigote and amastigote stages of *Leishmania amazonensis*: the role of opsonins in parasite uptake and dendritic cell maturation. *J Cell Sci* 117: 315–325.
64. Belkaid Y, Hoffmann KF, Mendez S, Kamhawi S, Udey MC et al. (2001) The role of interleukin (IL)-10 in the persistence of *Leishmania major* in the skin after healing and the therapeutic potential of anti-IL-10 receptor antibody for sterile cure. *J Exp Med* 194: 1497–1506.
65. Vasquez RE, Xin L, Soong L (2008) Effects of CXCL10 on dendritic cell and CD4+ T-cell functions during *Leishmania amazonensis* infection. *Infect Immun* 76: 161–169.
66. Hofer S, Ivarsson L, Stoitzner P, Auffinger M, Rainer C et al. (2003) Adenosine slows migration of dendritic cells but does not affect other aspects of dendritic cell maturation. *J Invest Dermatol* 121: 300–307.
67. la Sala A, Ferrari D, Corinti S, Cavani A, Di Virgilio F et al. (2001) Extracellular ATP induces a distorted maturation of dendritic cells and inhibits their capacity to initiate Th1 responses. *J Immunol* 166: 1611–1617.
68. Panther E, Corinti S, Idzko M, Herouy Y, Napp M et al. (2003) Adenosine affects expression of membrane molecules, cytokine and chemokine release, and the T-cell stimulatory capacity of human dendritic cells. *Blood* 101: 3985–3990.
69. Proudfoot L, Nikolaev AV, Feng GJ, Wei WQ, Ferguson MA et al. (1996) Regulation of the expression of nitric oxide synthase and leishmanicidal activity by glycoconjugates of *Leishmania* lipophosphoglycan in murine macrophages. *Proc Natl Acad Sci U S A* 93: 10984–10989.
70. Channon JY, Roberts MB, Blackwell JM (1984) A study of the differential respiratory burst activity elicited by promastigotes and amastigotes of *Leishmania donovani* in murine resident peritoneal macrophages. *Immunology* 53: 345–355.
71. Pham NK, Mouriz J, Kima PE (2005) *Leishmania pijanoi* amastigotes avoid macrophage production of superoxide by inducing heme degradation. *Infect Immun* 73: 8322–8333.
72. Linares E, Giorgio S, Mortara RA, Santos CX, Yamada AT et al. (2001) Role of peroxynitrite in macrophage microbicidal mechanisms in vivo revealed by protein nitration and hydroxylation. *Free Radic Biol Med* 30: 1234–1242.
73. Assreuy J, Cunha FQ, Epperlein M, Noronha-Dutra A, O'Donnell CA et al. (1994) Production of nitric oxide and superoxide by activated macrophages and killing of *Leishmania major*. *Eur J Immunol* 24: 672–676.
74. de Oliveira CI, Teixeira MJ, Teixeira CR, Ramos de JJ, Bomura RA et al. (2004) *Leishmania braziliensis* isolates differing at the genome level display distinctive features in BALB/c mice. *Microbes Infect* 6: 977–984.
75. Ives A, Ronet C, Prevel F, Ruzzante G, Fuertes-Marraco S et al. (2011) *Leishmania* RNA virus controls the severity of mucocutaneous leishmaniasis. *Science* 331: 775–778.
